# Supplementary material
Source: Springer Nature journal article supplement (https://www.springermedizin.de/resource/supplementary/12955_2012_1152_MOESM4_ESM.pdf/9559344)
Supplement: MOESM4 [file 9559344]

For each statement please tick one box

**C**

## FAMILY / RELATIONSHIPS

*The following statements refer to the influence of your chronic condition on your decisions about your family / relationships.*

No influence OR  
Not applicable

Slight influence

Moderate influence

Strong influence

Very strong  
influence

- |                                                           |                          |                          |                          |                          |                          |
|-----------------------------------------------------------|--------------------------|--------------------------|--------------------------|--------------------------|--------------------------|
| 1. I decided to change my plans for when to have children | <input type="checkbox"/> |
| 2. I decided not to have children                         | <input type="checkbox"/> |
| 3. I decided not to have a sexual relationship            | <input type="checkbox"/> |
| 4. I decided not to marry or have a long term partner     | <input type="checkbox"/> |
| 5. I decided to get divorced or separate from my partner  | <input type="checkbox"/> |

**D**

## SOCIAL

*The following statements refer to the influence of your chronic condition on your decisions about your social life.*

- |                                                              |                          |                          |                          |                          |                          |
|--------------------------------------------------------------|--------------------------|--------------------------|--------------------------|--------------------------|--------------------------|
| 1. I decided to change my eating habits                      | <input type="checkbox"/> |
| 2. I decided to change my smoking/drinking alcohol habits    | <input type="checkbox"/> |
| 3. I decided not to travel or go for holidays abroad         | <input type="checkbox"/> |
| 4. I decided to move                                         | <input type="checkbox"/> |
| 5. I decided not to move                                     | <input type="checkbox"/> |
| 6. I decided not to move abroad                              | <input type="checkbox"/> |
| 7. I decided to wear different types/colour of clothes/shoes | <input type="checkbox"/> |
| 8. I decided not to be involved in community activities      | <input type="checkbox"/> |
| 9. I decided not to socialise                                | <input type="checkbox"/> |
| 10. I decided not to wear make up                            | <input type="checkbox"/> |
